1        **Forecasting COVID-19 infection trends in the EU-27 countries,**  
2        **the UK and Switzerland due to SARS-CoV-2 Variant of Concern**  
3        **Omicron**

4  
5                    Alberto Giovanni Gerli,<sup>1</sup> <https://orcid.org/0000-0003-4511-6878>  
6                    Stefano Centanni,<sup>2,3</sup> <https://orcid.org/0000-0001-9923-535X>  
7                    Joan B Soriano,<sup>4,5,6</sup> <http://orcid.org/0000-0001-9740-2994>  
8                    Julio Ancochea<sup>4,5,6</sup> <https://orcid.org/0000-0001-7451-4133>  
9

10        <sup>1</sup> Department of Health Sciences, Università degli Studi di Milano, Milan, Italy  
11

12        <sup>2</sup> Respiratory Unit, aSST Santi Paolo e Carlo, San Paolo Hospital, Milan, Italy  
13

14        <sup>3</sup> Department of Health Sciences, University of Milan, Milan, Italy  
15

16        <sup>4</sup> Servicio de Neumología, Hospital Universitario La Princesa, Madrid, Spain  
17

18        <sup>5</sup> Facultad de Medicina, Universidad Autónoma de Madrid, Madrid, Spain  
19

20        <sup>6</sup> Centro de Investigación en Red de Enfermedades Respiratorias (CIBERES), Instituto de  
21        Salud Carlos III (ISCIII), Madrid, Spain  
22

23  
24

25        **Correspondence to:**

26        Dr Joan B Soriano [<http://orcid.org/0000-0001-9740-2994>]

27        Servicio de Neumología, 6ª planta

28        Hospital Universitario de la Princesa

29        Diego de León 62, 28006-Madrid, Spain

30        **Email:** [jbsoriano2@gmail.com](mailto:jbsoriano2@gmail.com)  
31

32        **Date:** December 16, 2021  
33

34        **Wordcount:** 1,129 words  
35

36        **Abstract word count:** 247 words  
37

38        **Number of references:** 17  
39

40        **Number of figures:** 1  
41

42        **Funding:** none

43 **Abstract:**

44

45 **Background:** On November 26, 2021, WHO designated the variant B.1.1.529 as a new  
46 SARS-CoV-2 variant of concern (VoC), named Omicron, originally identified in South  
47 Africa. Several mutations in Omicron indicate that it may have an impact on how it  
48 spreads, resistance to vaccination, or the severity of illness it causes.

49

50 **Methods:** We used our previous modelling algorithms to forecast the spread of  
51 Omicron aggregated in the EU-27 countries, the United Kingdom and Switzerland, and  
52 report trends in daily cases with a 7-day moving average. We followed EQUATOR's  
53 TRIPOD guidance for multivariable prediction models. Modelling included a third-  
54 degree polynomial curve in existing epidemiological trends on the spread of Omicron  
55 in South Africa, a five-parameter logistic (5PL) asymmetrical sigmoidal curve following  
56 a parametric growth in Europe, and a new Gaussian curve to estimate a downward  
57 trend after a peak.

58

59 **Results:** Up to January 15, 2022, we estimated a background rate projection in EU-27  
60 countries, the UK and Switzerland of about 145,000 COVID-19 daily cases without  
61 Omicron, which increases up to 440,000 COVID-19 daily cases in the worst scenario of  
62 Omicron spread, and 375,000 in the "best" scenario. Therefore, Omicron might  
63 represent a relative increase from the background daily rates of COVID-19 infection in  
64 Europe of 1.03-fold or 2.03-fold, that is up to a 200% increase.

65

66 **Conclusion:** This warning pandemic surge due to Omicron is calling for further  
67 reinforcing of COVID-19 universal hygiene interventions (indoor ventilation, social  
68 distance, and face masks), and anticipating the need of new lockdowns in Europe.

69

70

71

72 **Text:**

73

74 Back in March to May 2020, Italy and Spain were the hardest hit European countries  
75 during the first wave of COVID-19.<sup>1</sup> There have been several successful attempts to  
76 forecast trends of incidence and mortality of COVID-19, most based upon knowledge  
77 on viral dynamics from previous pandemics, recent COVID-19 geographical information  
78 of diverse granularity, and newly discovered viral characteristics.<sup>2,3</sup> However, SARS-  
79 CoV-2 inherent poor quality RNAm copy-editing gene replication makes it prone to  
80 mutate and spontaneously create new variants of concern (VoC),<sup>4</sup> that adapt to any  
81 hostile environment, produce new outbreaks, and modify existing epidemiological  
82 projections.<sup>5</sup>

83

84 On November 26, 2021, WHO designated the variant B.1.1.529 as a new VoC, named  
85 Omicron, originally identified in South Africa, on the advice of WHO's Technical  
86 Advisory Group on Virus Evolution.<sup>6</sup> This decision was based on the evidence that  
87 Omicron has several mutations that may have an impact on how it spreads, resistance  
88 to vaccination, or the severity of illness it causes.<sup>7</sup> In particular, in South Africa up to

89 December 2, 2021 it was observed a doubling time for the first 3 days after the wave  
90 threshold of ten cases per 100 000 population.<sup>8,9</sup>

91

92 We used our previous modelling algorithms,<sup>10,11,12</sup> to forecast the spread of Omicron  
93 aggregated in the EU-27 countries, the United Kingdom and Switzerland, and report  
94 trends in daily cases with a 7-day moving average. We followed EQUATOR's TRIPOD  
95 guidance for multivariable prediction models.<sup>13</sup> By applying firstly a third-degree  
96 polynomial curve in existing epidemiological trends on the spread of Omicron in South  
97 Africa, starting from the first 17 days of the Omicron outbreak (from November 11,  
98 2021), and secondly a five-parameter logistic (5PL) asymmetrical sigmoidal curve  
99 following a parametric growth,<sup>10-12</sup> we were able to model new infections of COVID-19  
100 in South Africa up to December 31, 2021. Overall, the best-case scenario is 80,000  
101 COVID-19 daily cases, while the worst case scenario is 120,000 (Figure 1A).

102

103 Then we modelled these trends to EU-27, the UK and Switzerland new COVID-19 cases  
104 using a new Gaussian curve to estimate a downward trend after a peak,<sup>14</sup> and we  
105 obtained the expected curve of new COVID-19 infections in Europe, which does not  
106 include the potential effect of Omicron VOC. Finally, we estimated the number of  
107 susceptible individuals based on actual vaccination in South Africa and applied them in  
108 Europe, and we added those cases to our actual predictive model. Given ongoing  
109 trends, we envisage a projection in EU-27 countries, the UK and Switzerland of about  
110 145,000 COVID-19 daily cases by January 15, 2022 without Omicron, which increases  
111 up to 440,000 COVID-19 daily cases by January 15, 2022 in the worst scenario of  
112 Omicron spread, and 375,000 in the "best" scenario (Figure 1B). Therefore, Omicron  
113 might represent a relative increase from the background daily rates of COVID-19  
114 infection in Europe of 1.03-fold or 2.03-fold, that is up to a 200% increase.

115

116 In probability theory, the conditional expectation of any warning system for an  
117 eventual surge of an infectious outbreak, as could happen with the Omicron  
118 substituting other SARS-CoV-2 VoC, modifies (reduces) the eventual magnitude of the  
119 event itself.<sup>15</sup> Given preliminary evidence from South Africa, our forecast anticipates a  
120 large increase in COVID-19 in Europe despite the high levels of vaccination in most of  
121 the region. Therefore, this warning is calling for further reinforcing of universal hygiene  
122 interventions (indoor ventilation, social distance, and face masks), and anticipating the  
123 need of new lockdowns,<sup>11</sup> the latter being extremely detrimental to many economies.

124

125 In Denmark, considered a European leader in sequencing SARS-CoV-2 VoC, where  
126 testing of all positive PCR tests is commonplace, cases of Omicron have been reported  
127 to double every second day.<sup>16</sup> There, almost 75% of those infected by Omicron had  
128 received full (two doses of) COVID-19 vaccination already. On the positive side, it  
129 appears most Omicron-related COVID-19 cases are mild or even pauci-symptomatic.

130

131 All viruses change in time and space by natural or artificial Darwin's selection, and  
132 survival of the fittest,<sup>17</sup> due either to high levels of herd immunity or low vaccination  
133 coverage, respectively. The toll associated with VoC Omicron underlines WHO's  
134 COVID-19 message that "No one will be safe, until the entire World is safe (ergo  
135 vaccinated)".

136 **Figure 1:** Trends in COVID-19 daily new infections with a seven-day moving average  
137 observed and expected in A) South Africa and B) EU-27 countries + UK + Switzerland  
138

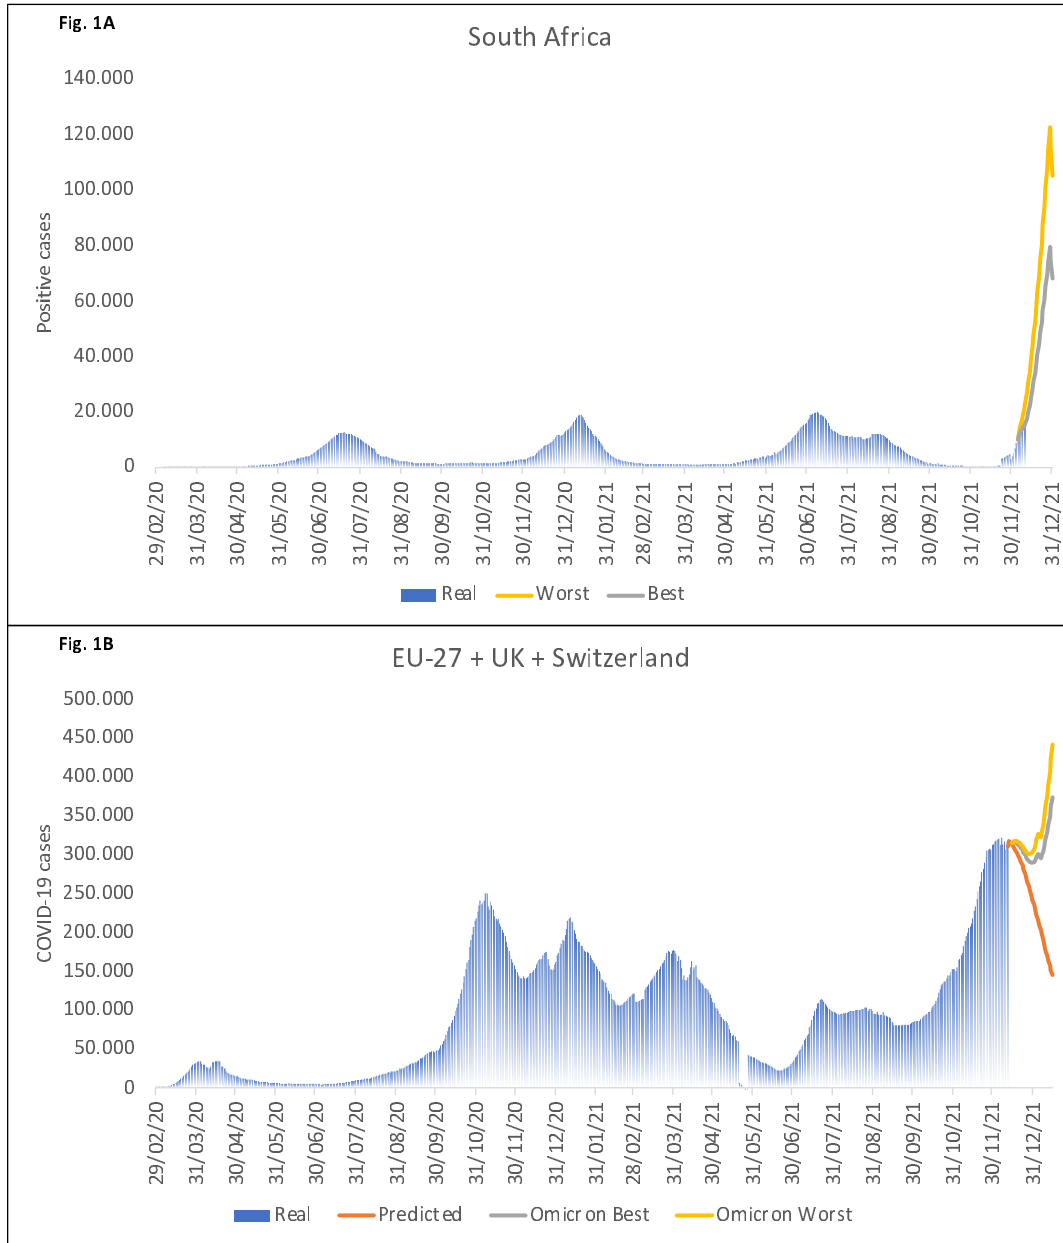

139  
140

## 141 References

- <sup>1</sup> World Health Organization. WHO Coronavirus (COVID-19) Dashboard. <https://covid19.who.int> Date last accessed: 9 December 2021.
- <sup>2</sup> Giordano G, Blanchini F, Bruno R, Colaneri P, Di Filippo A, Di Matteo A, Colaneri M. Modelling the COVID-19 epidemic and implementation of population-wide interventions in Italy. *Nat Med*. 2020 Jun;26(6):855-860. doi: 10.1038/s41591-020-0883-7. Epub 2020 Apr 22. PMID: 32322102
- <sup>3</sup> Nadella P, Swaminathan A, Subramanian SV. Forecasting efforts from prior epidemics and COVID-19 predictions. *Eur J Epidemiol*. 2020 Aug;35(8):727-729. doi: 10.1007/s10654-020-00661-0. Epub 2020 Jul 17. PMID: 32676971
- <sup>4</sup> Nextstrain. Genomic epidemiology of novel coronavirus – global subsampling. <https://nextstrain.org/ncov/gisaid/global> Date last accessed: 13 December 2021.
- <sup>5</sup> García-Basteiro AL, Chaccour C, Guinovart C, Llupia A, Brew J, Trilla A, Plasencia A. Monitoring the COVID-19 epidemic in the context of widespread local transmission. *Lancet Respir Med*. 2020 May;8(5):440-442. doi: 10.1016/S2213-2600(20)30162-4. Epub 2020 Apr 2. PMID: 32247325
- <sup>6</sup> Update on Omicron. WHO. <https://www.who.int/news/item/28-11-2021-update-on-omicron> Date last accessed: 13 December 2021.
- <sup>7</sup> Callaway E, Ledford H. How bad is Omicron? What scientists know so far. *Nature*. 2021 Dec;600(7888):197-199. doi: 10.1038/d41586-021-03614-z. PMID: 34857948
- <sup>8</sup> Karim SSA, Karim QA. Omicron SARS-CoV-2 variant: a new chapter in the COVID-19 pandemic. *Lancet*. 2021 Dec 3:S0140-6736(21)02758-6. doi: 10.1016/S0140-6736(21)02758-6. Online ahead of print. PMID: 34871545
- <sup>9</sup> Department of Health, Government of South Africa. COVID-19. Dec 2, 2021. <https://sacoronavirus.co.za/> (accessed Dec 2, 2021).
- <sup>10</sup> Sotgiu G, Gerli AG, Centanni S, Miozzo M, Canonica GW, Soriano JB, Virchow JC. Advanced forecasting of SARS-CoV-2-related deaths in Italy, Germany, Spain, and New York State. *Allergy*. 2020 Jul;75(7):1813-1815. doi: 10.1111/all.14327. Epub 2020 May 11. PMID: 32306406
- <sup>11</sup> Gerli AG, Centanni S, Miozzo MR, Virchow JC, Sotgiu G, Canonica GW, Soriano JB. COVID-19 mortality rates in the European Union, Switzerland, and the UK: effect of timeliness, lockdown rigidity, and population density. *Minerva Med*. 2020 Aug;111(4):308-314. doi: 10.23736/S0026-4806.20.06702-6. Epub 2020 Jun 2. PMID: 32491297
- <sup>12</sup> Gerli AG, Centanni S, Miozzo M, Sotgiu G. Predictive models for COVID-19-related deaths and infections. *Int J Tuberc Lung Dis*. 2020 Jun 1;24(6):647-650. doi: 10.5588/ijtld.20.0196. PMID: 32552999
- <sup>13</sup> Transparent reporting of a multivariable prediction model for individual prognosis or diagnosis (TRIPOD): The TRIPOD statement <https://www.equator-network.org/reporting-guidelines/tripod-statement/> (accessed Dec 14, 2021).
- <sup>14</sup> Dhamodharavadhani S, Rathipriya R. COVID-19 mortality rate prediction for India using statistical neural networks and gaussian process regression model. *Afr Health Sci*. 2021 Mar;21(1):194-206. doi: 10.4314/ahs.v21i1.26. PMID: 34394298
- <sup>15</sup> Billingsley, Patrick (1995). "Section 34. Conditional Expectation". *Probability and Measure* (3rd ed.). John Wiley & Sons. p. 445. ISBN 0-471-00710-2.

---

<sup>16</sup> Denmark's Omicron Surge Is a Warning to the Rest of World. By Niclas Rolander. Bloomberg <https://www.bloomberg.com/news/articles/2021-12-10/denmark-s-omicron-surge-is-a-warning-to-the-rest-of-world> Date last accessed: 13 December 2021.

<sup>17</sup> Wang R, Chen J, Wei GW. Mechanisms of SARS-CoV-2 Evolution Revealing Vaccine-Resistant Mutations in Europe and America. *J Phys Chem Lett*. 2021 Dec 7:11850-11857. doi: 10.1021/acs.jpcclett.1c03380. Online ahead of print. PMID: 34873910
